# Supplementary material for: Protein DJ-1 and its anti-oxidative stress function play an important role in renal cell mediated response to profibrotic agents
Source: Royal Society of Chemistry journal article supplement (doi:10.1039/c5mb00887e), 2016-04-07
Supplement: c5mb00887e2.pdf [file c5mb00887e2.pdf]

**Table 1:** List of proteins found to be differently expressed in the ANGII treated TK-173 cell line compared with untreated control. The gene name, accession number in Swiss-Prot, molecular weight, the peptide mass fingerprinting (PMF), MS/MS information and the sequence coverage are given. The spots where MS/MS-data are missing were only identified with PMF.

| Spot Nr. | Protein Name                                         | Gene Name | SwissProt Accession | Mol. Wt. | CPI  | PMF Score | PMF Seq. Cov. | MS/MS Score | MS/MS Seq. Cov. |
|----------|------------------------------------------------------|-----------|---------------------|----------|------|-----------|---------------|-------------|-----------------|
| 1        | Translationally controlled tumor protein             | TPT1      | P13693              | 19595    | 4.84 |           |               | 352         | 14              |
| 2        | Microtubule-associated protein RP/EB family member 1 | MAPRE1    | Q15691              | 29999    | 5.02 | 77        | 22            |             |                 |
| 3        | Small ubiquitin-related modifier 2                   | SUMO2     | P61956              | 10871    | 5.32 |           |               | 120         | 5               |
| 4        | Myosin regulatory light chain 12A                    | MYL12A    | P19105              | 19794    | 4.65 |           |               | 111         | 9               |
| 5        | Prefoldin subunit 2                                  | PFDN2     | Q9UHV9              | 16648    | 6.20 |           |               | 114         | 5               |
| 6        | Ferritin light chain                                 | FTL       | P02792              | 20020    | 5.50 |           |               | 144         | 7               |
| 7        | Microtubule-associated protein RP/EB family member 1 | MAPRE1    | Q15691              | 29999    | 5.02 | 92        | 24            |             |                 |
| 8        | EF-hand domain-containing protein D2                 | EFHD2     | Q96C19              | 26697    | 5.15 | 105       | 9             |             |                 |
| 9        | Peroxiredoxin-1                                      | PRDX1     | Q06830              | 22110    | 8.27 |           |               | 201         | 11              |
| 10       | Peptidyl-prolyl cis-trans isomerase A                | PPIA      | P62937              | 18012    | 7.68 | 176       | 11            |             |                 |
| 11       | Cofilin-1                                            | CFL1      | P23528              | 18502    | 8.22 |           |               | 134         | 8               |
| 12       | Endoplasmic reticulum chaperone BiP                  | HSP90B1   | P14625              | 92469    | 4.76 |           |               | 76          | 6               |
| 13       | Fibronectin                                          | FN1       | P02751              | 262607   | 5.46 |           |               | 574         | 18              |
| 14       | Fibronectin                                          | FN1       | P02751              | 262607   | 5.46 |           |               | 707         | 27              |
| 15       | Heat shock 70 kDa protein 4                          | HSPA4     | P34932              | 94331    | 5.10 |           |               | 211         | 18              |
| 16       | Heat shock protein HSP 90-alpha                      | HSP90AA1  | P07900              | 84660    | 4.94 | 115       | 12            |             |                 |
| 17       | Transitional endoplasmic reticulum ATPase            | VCP       | P55072              | 89322    | 5.14 |           |               | 322         | 21              |
| 18       | Caprin-1                                             | CAPRIN1   | Q14444              | 78366    | 5.04 |           |               | 69          | 7               |
| 19       | Heat shock 70 kDa protein 1                          | HSPA1A    | P08107              | 70052    | 5.47 | 64        | 11            |             |                 |
| 20       | Stress-70 protein, mitochondrial                     | HSPA9     | P38646              | 73680    | 5.87 | 114       | 13            |             |                 |
| 21       | Lamin-B1                                             | LMNB1     | P20700              | 66408    | 5.11 |           |               | 82          | 3               |
| 22       | Alpha-enolase                                        | ENO1      | P06733              | 47169    | 7.01 |           |               | 179         | 8               |

|    |                                                         |         |        |        |      |     |    |     |    |
|----|---------------------------------------------------------|---------|--------|--------|------|-----|----|-----|----|
| 23 | Fumarate hydratase, mitochondrial                       | FH      | P07954 | 54637  | 8.85 |     |    | 42  | 7  |
| 24 | 26S protease regulatory subunit 8                       | PSMC5   | P62195 | 45626  | 7.11 |     |    | 291 | 19 |
| 25 | Cytosolic acyl coenzyme A thioester hydrolase           | ACOT7   | O00154 | 41796  | 8.85 |     |    | 261 | 11 |
| 26 | Calponin-2                                              | CNN2    | Q99439 | 33697  | 6.94 |     |    | 127 | 6  |
| 27 | Far upstream element-binding protein 2                  | KHSRP   | Q92945 | 73146  | 6.85 |     |    | 124 | 6  |
| 28 | Ras-related protein rab-11A                             | RAB11A  | P62491 | 24394  | 6.12 |     |    | 159 | 7  |
| 29 | LIM and SH3 domain protein 1                            | LASP1   | Q14847 | 29717  | 6.61 |     |    | 146 | 8  |
| 30 | Abhydrolase domain-containing protein 10, mitochondrial | ABHD10  | Q9NUJ1 | 33933  | 8.81 |     |    | 118 | 9  |
| 31 | Heat shock protein 105 kDa                              | HSPH1   | Q92598 | 96865  | 5.27 |     |    | 66  | 7  |
| 32 | Splicing factor 3 subunit 1                             | SF3A1   | Q15459 | 88886  | 5.15 | 179 | 18 |     |    |
| 33 | Caprin-1                                                | CAPRIN1 | Q14444 | 78366  | 5.04 |     |    | 64  | 3  |
| 34 | Peroxisome biogenesis factor 1                          | PEX1    | O43933 | 142867 | 5.91 |     |    | 71  | 4  |
| 35 | Serine/threonine protein phosphatase 2A 65 kDa          | PPP2R1A | P30153 | 65309  | 5.00 |     |    | 63  | 5  |
| 36 | Tubulin alpha-1A chain                                  | TUBA1A  | Q71U36 | 50136  | 4.94 |     |    | 70  | 5  |
| 37 | Tubulin alpha-1B chain                                  | TUBA1B  | P68363 | 50152  | 4.94 |     |    | 125 | 8  |
| 38 | Glutaredoxin-3                                          | GLRX3   | O76003 | 37432  | 5.31 | 63  | 9  |     |    |
| 39 | UBX domain-containing protein 1                         | UBXN1   | Q04323 | 33325  | 5.23 |     |    | 136 | 11 |
| 40 | N-myc-interactor                                        | NMI     | Q13287 | 35057  | 5.23 | 92  | 14 |     |    |
| 41 | Protein DJ-1                                            | PARK7   | Q99497 | 19891  | 6.32 |     |    | 71  | 5  |
| 42 | Copine-1                                                | CPNE1   | Q99829 | 59059  | 5.52 |     |    | 68  | 3  |
| 43 | Peptidyl-prolyl-cis trans isomerase A                   | PPIA    | P62937 | 18012  | 7.68 |     |    | 80  | 4  |
| 44 | Ubiquitin-conjugating enzyme E2 N                       | UBE2N   | P61088 | 17138  | 6.13 |     |    | 82  | 7  |
| 45 | GTP-binding nuclear protein Ran                         | RAN     | P62826 | 24423  | 7.01 |     |    | 66  | 4  |
| 46 | Superoxide dismutase (Mn), mitochondrial                | SOD2    | P04179 | 24722  | 8.35 | 116 | 15 |     |    |
| 47 | Malate dehydrogenase, cytoplasmic                       | MDH1    | P40925 | 36426  | 6.91 |     |    | 88  | 6  |
| 48 | Syntenin-1                                              | SDCBP   | O00560 | 32444  | 7.06 |     |    | 81  | 5  |
| 49 | Glyceraldehyde-3-phosphate dehydrogenase                | GAPDH   | P04406 | 36053  | 8.57 |     |    | 104 | 10 |
| 50 | Annexin 1                                               | ANXA1   | P04083 | 38714  | 6.57 |     |    | 118 | 6  |
| 51 | Annexin 2                                               | ANXA2   | P07355 | 38604  | 7.57 |     |    | 175 | 8  |
| 52 | Fructose-bisphosphate aldolase A                        | ALDOA   | P04075 | 39420  | 8.30 |     |    | 149 | 9  |

|    |                                                   |         |        |        |      |     |    |     |    |
|----|---------------------------------------------------|---------|--------|--------|------|-----|----|-----|----|
| 53 | BAG family molecular chaperone regulator 2        | BAG2    | O95816 | 23772  | 6.25 |     |    | 86  | 6  |
| 54 | Annexin A5                                        | ANXA5   | P08758 | 35937  | 4.93 | 156 | 8  |     |    |
| 55 | Calponin-3                                        | CNN3    | Q15417 | 36414  | 5.69 |     |    | 65  | 2  |
| 56 | Calponin-3                                        | CNN3    | Q15417 | 36414  | 5.69 |     |    | 62  | 6  |
| 57 | Pyruvate kinase isozymes M1/M2                    | PKM2    | P14618 | 57937  | 7.96 |     |    | 89  | 6  |
| 58 | Actin, cytoplasmic 1                              | ACTB    | P60709 | 41737  | 5.29 |     |    | 378 | 14 |
| 59 | Superoxide dismutase (Cu-Zn)                      | SOD1    | P00441 | 15936  | 5.70 |     |    | 88  | 6  |
| 60 | Vimentin                                          | VIM     | P08670 | 53652  | 5.05 |     |    | 262 | 16 |
| 61 | Nuclear migration protein nudC                    | NUDC    | Q9Y266 | 38243  | 5.27 |     |    | 232 | 14 |
| 62 | Proteasome subunit alpha type-3                   | PSMA3   | P25788 | 28415  | 5.19 |     |    | 225 | 9  |
| 63 | Proteasome subunit beta type-7                    | PSMB7   | Q99436 | 29946  | 7.58 |     |    | 128 | 6  |
| 64 | T-complex protein 1 subunit alpha                 | TCP1    | P17987 | 60306  | 5.80 |     |    | 190 | 8  |
| 65 | Peroxiredoxin-6                                   | PRDX6   | P30041 | 25035  | 6.00 |     |    | 261 | 9  |
| 66 | Vimentin                                          | VIM     | P08670 | 53619  | 5.05 |     |    | 438 | 14 |
| 67 | Hydroxymethyl glutaryl-CoA synthase, cytomplasmic | HMGCS1  | Q01581 | 57257  | 5.22 |     |    | 516 | 11 |
| 68 | 60 kDa heat shock protein,mitochondrial           | HSPD1   | P10809 | 61016  | 5.70 |     |    | 600 | 19 |
| 69 | Cytoplasmic dynein 1 intermediate chain 2         | DYNC1I2 | Q13409 | 71457  | 5.08 |     |    | 59  | 6  |
| 70 | Peroxiredoxin-5, mitochondrial                    | PRDX5   | P30044 | 22026  | 8.93 |     |    | 140 | 8  |
| 71 | Nucleophosmin                                     | NPM1    | P06748 | 32575  | 4.64 | 60  | 17 |     |    |
| 72 | Prelamin-A/C                                      | LMNA    | P02545 | 74139  | 6.57 |     |    | 148 | 4  |
| 73 | Annexin A5                                        | ANXA5   | P08758 | 35937  | 4.93 | 235 | 25 |     |    |
| 74 | WD repeat-containing protein 61                   | WDR61   | Q9GZS3 | 33581  | 5.16 | 100 | 11 |     |    |
| 75 | 78 kDa glucose-regulated protein                  | HSPA5   | P11021 | 72333  | 5.07 | 165 | 12 |     |    |
| 76 | Actin, cytoplasmic 2                              | ACTG1   | P63261 | 41793  | 5.31 | 70  | 13 |     |    |
| 77 | Collagen alpha-1 (I) chain                        | COL1A1  | P02452 | 138911 | 5.50 |     |    | 83  | 7  |
| 78 | Laminin subunit gamma-1                           | LAMC1   | P11047 | 177603 | 5.01 |     |    | 61  | 4  |
| 79 | Sex hormone-binding globulin                      | SHBG    | P04278 | 43779  | 6.22 |     |    | 62  | 5  |
| 80 | Cytoplasmic dynein 1 heavy chain 1                | DYNC1H1 | Q14204 | 532408 | 6.01 |     |    | 78  | 4  |
| 81 | Serine hydroxymethyltransferase, mitochondrial    | SHMT2   | P34897 | 55993  | 8.76 |     |    | 164 | 12 |
| 82 | Glutamate dehydrogenase 1, mitochondrial          | GLUD1   | P00367 | 61398  | 7.66 |     |    | 112 | 6  |
| 83 | Ezrin                                             | EZR     | P15311 | 69413  | 5.94 |     |    | 85  | 7  |

|    |                                 |      |        |       |      |  |  |    |   |
|----|---------------------------------|------|--------|-------|------|--|--|----|---|
| 84 | Glial fibrillary acidic protein | GFAP | P14136 | 49880 | 5.42 |  |  | 77 | 4 |
| 85 | Elongation factor 2             | EEF2 | P13639 | 95338 | 6.41 |  |  | 95 | 6 |

**Table 2:** List of proteins found to be differently expressed in the PDGF treated TK-173 cell line compared with untreated control. The gene name, accession number in Swiss-Prot, molecular weight, the peptide mass fingerprinting (PMF), MS/MS information and the sequence coverage are given. The spots where MS/MS-data are missing were only identified with PMF.

| Spot Nr. | Protein Name                              | Gene Name | SwissProt Accession | Mol. Wt. | CPI  | PMF Score | PMF Seq. Cov. | MS/MS Score | MS/MS Seq. Cov. |
|----------|-------------------------------------------|-----------|---------------------|----------|------|-----------|---------------|-------------|-----------------|
| 1        | Actin, cytoplasmic 1                      | ACTB      | P60709              | 41710    | 5.29 |           |               | 305         | 15              |
| 2        | Actin, cytoplasmic 1                      | ACTB      | P60709              | 41710    | 5.29 |           |               | 238         | 7               |
| 3        | Elongation factor 1-delta                 | EEF1D     | P29692              | 31103    | 4.9  |           |               | 388         | 8               |
| 4        | Chromobox protein homolog 5               | CBX5      | P45973              | 22211    | 5.71 |           |               | 174         | 6               |
| 5        | Proteasome subunit alpha type-3           | PSMB3     | P49720              | 28415    | 6.13 |           |               | 254         | 6               |
| 6        | Tubulin beta chain                        | TUBB      | Q9BUU9              | 49639    | 4.75 | 60        | 14            |             |                 |
| 7        | Tubulin beta chain                        | TUBB      | Q9BUU9              | 49639    | 4.75 |           |               | 88          | 8               |
| 8        | Peptidyl-prolyl cis-trans isomerase A     | PPIA      | P62937              | 18001    | 7.68 | 101       | 11            |             |                 |
| 9        | Tubulin beta chain                        | TUBB      | Q9BUU9              | 49639    | 4.75 |           |               | 262         | 6               |
| 10       | Adapter molecule crk                      | CRK       | P46108              | 33810    | 5.38 | 101       | 13            |             |                 |
| 11       | L-lactate dehydrogenase B chain           | LDHB      | P07195              | 36615    | 5.71 | 63        | 3             |             |                 |
| 12       | Inorganic pyrophosphatase                 | PPA1      | Q15181              | 32639    | 5.54 | 65        | 3             |             |                 |
| 13       | Heat shock protein 90-beta                | HSP90AB1  | P08238              | 83212    | 4.96 | 65        | 2             |             |                 |
| 14       | Heat shock 70 kDa protein 4               | HSPA4     | P34932              | 94271    | 5.10 | 91        | 4             |             |                 |
| 15       | Heat shock 70 kDa protein 4               | HSPA4     | P34932              | 94271    | 5.10 | 84        | 4             |             |                 |
| 16       | Heat shock 70 kDa protein 4               | HSPA4     | P34932              | 94271    | 5.10 | 79        | 3             |             |                 |
| 17       | Hypoxia up-regulated protein 1            | HYOU1     | Q9Y4L1              | 111266   | 5.16 |           |               | 133         | 26              |
| 18       | Hypoxia up-regulated protein 1            | HYOU1     | Q9Y4L1              | 111266   | 5.16 |           |               | 110         | 22              |
| 19       | Caprin-1                                  | CAPRIN1   | Q14444              | 78318    | 5.14 | 114       | 5             |             |                 |
| 20       | Heat shock 70 kDa protein 4               | HSPA4     | P34932              | 94271    | 5.10 |           |               | 292         | 10              |
| 21       | Transitional endoplasmic reticulum ATPase | VCP       | P55072              | 89266    | 5.14 | 90        | 20            |             |                 |
| 22       | Transitional endoplasmic reticulum ATPase | VCP       | P55072              | 89266    | 5.14 | 71        | 16            |             |                 |

|    |                                           |          |        |        |      |     |    |     |    |
|----|-------------------------------------------|----------|--------|--------|------|-----|----|-----|----|
| 23 | Thioredoxin                               | TXN      | P10599 | 11730  | 4.82 | 77  | 8  |     |    |
| 24 | Coactosin-like protein                    | COTL1    | Q14019 | 15935  | 5.50 | 83  | 11 |     |    |
| 25 | Actin, cytoplasmic 1                      | ACTB     | P60709 | 41710  | 5.29 |     |    | 210 | 9  |
| 26 | Actin, cytoplasmic 1                      | ACTB     | P60709 | 41710  | 5.29 |     |    | 217 | 9  |
| 27 | Peroxiredoxin-1                           | PRDX1    | Q06830 | 22096  | 8.27 |     |    | 174 | 8  |
| 28 | Annexin A2                                | ANXA2    | P07355 | 38580  | 7.57 |     |    | 547 | 16 |
| 29 | Prohibitin                                | PHB      | P35232 | 29786  | 5.57 |     |    | 266 | 7  |
| 30 | Tubulin beta-4B chain                     | TBB4B    | P68371 | 49799  | 4.79 |     |    | 424 | 18 |
| 31 | Nucleoside diphosphate kinase A           | NME1     | P15531 | 17138  | 5.81 |     |    | 243 | 9  |
| 32 | Protein DJ-1                              | PARK7    | Q99497 | 19878  | 6.32 |     |    | 115 | 7  |
| 33 | Cofilin-1                                 | CFL1     | P10668 | 18491  | 8.16 |     |    | 117 | 6  |
| 34 | Superoxide dismutase [Mn], mitochondrial  | SOD2     | P04179 | 24707  | 8.35 | 90  | 10 |     |    |
| 35 | GTP-binding nuclear protein Ran           | RAN      | P62826 | 24408  | 7.01 |     |    | 193 | 5  |
| 36 | Phosphoglycerate mutase 1                 | PGAM1    | P18669 | 28786  | 6.67 |     |    | 112 | 8  |
| 37 | Far upstream element-binding protein 2    | KHSRP    | Q92945 | 73101  | 6.85 | 115 | 19 |     |    |
| 38 | Stress-induced-phosphoprotein 1           | STIP1    | P31948 | 62599  | 6.40 | 150 | 35 |     |    |
| 39 | Prelamin-A/C                              | LMNA     | P02545 | 74095  | 6.57 | 147 | 31 |     |    |
| 40 | Prelamin-A/C                              | LMNA     | P02545 | 74095  | 6.57 |     |    | 44  | 3  |
| 41 | Prelamin-A/C                              | LMNA     | P02545 | 74095  | 6.57 | 169 | 19 |     |    |
| 42 | Prelamin-A/C                              | LMNA     | P02545 | 74095  | 6.57 |     |    | 71  | 20 |
| 43 | Heat shock protein HSP 90-beta            | HSP90AB1 | P08238 | 83212  | 4.96 |     |    | 454 | 12 |
| 44 | Nucleolin                                 | NCL      | P19338 | 76568  | 4.60 |     |    | 305 | 13 |
| 45 | Nucleolin                                 | NCL      | P19338 | 76568  | 4.60 |     |    | 219 | 9  |
| 46 | Heat shock protein HSP 90-beta            | HSP90AB1 | P08238 | 83212  | 4.96 |     |    | 502 | 15 |
| 47 | Spectrin alpha chain, brain               | SPTAN1   | Q13813 | 284364 | 5.22 |     |    | 340 | 19 |
| 48 | Pyruvate kinase isozymes M1/M2            | PKM2     | P14618 | 57900  | 7.96 | 159 | 20 |     |    |
| 49 | Pyruvate kinase isozymes M1/M2            | PKM2     | P14618 | 57900  | 7.96 | 180 | 23 |     |    |
| 50 | Pyruvate kinase isozymes M1/M2            | PKM2     | P14618 | 57900  | 7.96 | 130 | 20 |     |    |
| 51 | Heterogeneous nuclear ribonucleoprotein K | HNRNPK   | P61978 | 50944  | 5.39 | 67  | 13 |     |    |
| 52 | Pyruvate kinase isozymes M1/M2            | PKM2     | P14618 | 57900  | 7.96 |     |    | 201 | 7  |
| 53 | Pyruvate kinase isozymes M1/M2            | PKM2     | P14618 | 57900  | 7.96 |     |    | 113 | 25 |

|    |                                                             |         |        |       |      |     |    |     |    |
|----|-------------------------------------------------------------|---------|--------|-------|------|-----|----|-----|----|
| 54 | Pyruvate kinase isozymes M1/M2                              | PKM2    | P14618 | 57900 | 7.96 |     |    | 69  | 15 |
| 55 | TAR DNA-binding protein 43                                  | TARDBP  | Q13148 | 44711 | 5.85 |     |    | 166 | 6  |
| 56 | Heterogeneous nuclear ribonucleoprotein D0                  | HNRNPD  | Q14103 | 38410 | 7.61 |     |    | 98  | 4  |
| 57 | Acetyl-CoA acetyltransferase, cytosolic                     | ACAT2   | Q9BWD1 | 41324 | 6.46 |     |    | 73  | 6  |
| 58 | Crk-like protein                                            | CRKL    | P46109 | 33756 | 6.26 |     |    | 63  | 3  |
| 59 | Proliferation-associated protein 2G4                        | PA2G4   | Q9UQ80 | 43759 | 6.13 |     |    | 146 | 9  |
| 60 | Vimentin                                                    | VIM     | P08670 | 53619 | 5.05 |     |    | 274 | 38 |
| 61 | Aldose reductase                                            | AKR1B1  | P15121 | 35830 | 6.52 |     |    | 193 | 4  |
| 62 | Poly (rC)-binding protein 1                                 | PCBP1   | Q15365 | 37474 | 6.66 |     |    | 104 | 6  |
| 63 | 14-3-3 protein epsilon                                      | YWHAE   | P62258 | 29155 | 4.63 |     |    | 95  | 3  |
| 64 | Chloride intracellular channel protein 1                    | CLIC1   | O00299 | 26906 | 5.09 |     |    | 192 | 5  |
| 65 | Actin, cytoplasmic 1                                        | ACTB    | P60709 | 41710 | 5.29 |     |    | 193 | 8  |
| 66 | Proteasome subunit alpha type-2                             | PSMA2   | P25787 | 25882 | 6.91 |     |    | 229 | 16 |
| 67 | Electron transfer flavoprotein subunit alpha, mitochondrial | ETFFA   | P13804 | 35058 | 8.62 |     |    | 235 | 14 |
| 68 | Alpha-enolase                                               | ENO1    | P06733 | 47139 | 7.01 | 142 | 22 |     |    |
| 69 | Heterogeneous nuclear ribonucleoprotein H                   | HNRNPH1 | P31943 | 49198 | 5.89 |     |    | 86  | 10 |
| 70 | Aldehyde dehydrogenase X, mitochondrial                     | ALDH1B1 | P30837 | 57202 | 6.36 |     |    | 218 | 18 |
| 71 | Prefoldin subunit 5                                         | PFDN5   | Q99471 | 17317 | 5.94 |     |    | 123 | 9  |
| 72 | Prefoldin subunit 2                                         | PFDN2   | Q9UHV9 | 16638 | 6.20 |     |    | 244 | 13 |
| 73 | Thioredoxin                                                 | TXN     | P10599 | 11730 | 4.82 |     |    | 125 | 4  |
| 74 | Glutathione S-transferase P                                 | GSTP1   | P09211 | 23341 | 5.43 | 62  | 7  |     |    |
| 75 | Peroxiredoxin-6                                             | PRDX6   | P30041 | 25035 | 6.00 |     |    | 211 | 12 |
| 76 | Protein disulfide-isomerase A3                              | PDIA3   | P30101 | 56747 | 5.98 | 157 | 27 |     |    |
| 77 | Vimentin                                                    | VIM     | P08670 | 53619 | 5.05 |     |    | 75  | 4  |
| 78 | Annexin A5                                                  | ANXA2   | P07355 | 38580 | 7.57 |     |    | 105 | 6  |
| 79 | Elongation factor1-delta                                    | EEF1D   | P29692 | 31103 | 4.90 |     |    | 89  | 5  |
| 80 | Actin, cytoplasmic 1                                        | ACTB    | P60709 | 41710 | 5.29 |     |    | 217 | 7  |
| 81 | 78-kDa glucose regulated protein                            | HSPA5   | P11021 | 72288 | 5.07 |     |    | 117 | 8  |
| 82 | Heat shock cognate 71 kDa protein                           | HSPA8   | P11142 | 70854 | 5.37 | 73  | 19 |     |    |
| 83 | Heat shock cognate 71 kDa protein                           | HSPA8   | P11142 | 70854 | 5.37 | 80  | 17 |     |    |

|    |                                                     |         |        |       |      |  |  |     |   |
|----|-----------------------------------------------------|---------|--------|-------|------|--|--|-----|---|
| 84 | Endoplasmin                                         | HSP90B1 | P14625 | 92411 | 4.76 |  |  | 156 | 7 |
| 85 | 39S ribosomal protein L12, mitochondrial            | MRPL12  | P52815 | 21335 | 9.05 |  |  | 174 | 5 |
| 86 | Glyceraldehyde-3-phosphate dehydrogenase            | GAPDH   | P04406 | 36030 | 8.57 |  |  | 165 | 5 |
| 87 | N(G),N(G)-dimethylarginine dimethylaminohydrolase 1 | DDAH1   | O94760 | 31102 | 5.53 |  |  | 140 | 6 |



**Table 3:** List of proteins found to be differently expressed in the ANGII treated HK-2 cell line compared with untreated control. The gene name, accession number in Swiss-Prot, molecular weight, the peptide mass fingerprinting (PMF), MS/MS information and the sequence coverage are given. The spots where MS/MS-data are missing were only identified with PMF.

| Spot Nr. | Protein Name                                 | Gene Name | SwissProt Accession | Mol. Wt. | CPI   | PMF Score | PMF Seq. Cov. | MS/MS Score | MS/MS Seq. Cov. |
|----------|----------------------------------------------|-----------|---------------------|----------|-------|-----------|---------------|-------------|-----------------|
| 1        | Serine/arginine-rich splicing factor 1       | SFRS1     | Q07955              | 27728    | 10.37 | 80        | 12            | 198         | 13              |
| 2        | Serine/arginine-rich splicing factor 1       | SFRS1     | Q07955              | 27728    | 10.37 | 91        | 9             |             |                 |
| 3        | Glutathione S-transferase omega-1            | GSTO 1    | P78417              | 27548    | 6.24  | 68        | 11            | 112         | 5               |
| 4        | Cathepsin D                                  | CTSD      | P07339              | 44524    | 6.10  | 60        | 11            |             |                 |
| 5        | Pyridoxal kinase                             | PDXK      | O00764              | 35080    | 5.75  |           |               | 122         | 6               |
| 6        | Heat shock protein beta-1                    | HSPB1     | P04792              | 22768    | 5.98  | 109       | 8             | 161         | 13              |
| 7        | GTP-binding nuclear protein Ran              | RAN       | P62826              | 24408    | 7.01  |           |               | 164         | 14              |
| 8        | Proteasome subunit beta type-2               | PSMB2     | P49721              | 22822    | 6.52  |           |               | 135         | 8               |
| 9        | 5'(3')-deoxyribonucleotidase, cytosolic type | NT5C      | Q8TCD5              | 23368    | 6.18  |           |               | 156         | 8               |
| 10       | Proteasome subunit alpha type-6              | PSMA6     | P60900              | 27382    | 6.34  |           |               | 200         | 13              |
| 11       | S-formylglutathione hydrolase                | ESD       | P10768              | 31442    | 6.54  | 65        | 10            | 68          | 5               |
| 12       | Protein DJ-1                                 | PARK7     | Q99497              | 19878    | 6.32  |           |               | 179         | 9               |
| 13       | Peroxiredoxin-6                              | PRDX6     | P30041              | 25035    | 6.00  |           |               | 148         | 7               |
| 14       | Far upstream element-binding protein 2       | KHSRP     | Q92945              | 73101    | 6.85  |           |               | 159         | 14              |
| 15       | Far upstream element-binding protein 1       | FUBP1     | Q96AE4              | 67518    | 7.18  | 113       | 13            | 111         | 5               |
| 16       | C-1-tetrahydrofolate synthase, cytoplasmic   | MTHFD1    | P11586              | 101495   | 6.89  |           |               | 64          | 13              |
| 17       | Elongation factor 2                          | EEF2      | P13639              | 95277    | 6.41  |           |               | 137         | 6               |
| 18       | Glutamate dehydrogenase 1, mitochondrial     | GLUD1     | P00367              | 61359    | 7.66  |           |               | 132         | 7               |
| 19       | Vinculin                                     | VCL       | P18206              | 123722   | 5.50  |           |               | 68          | 16              |
| 20       | Spectrin alpha chain, brain                  | SPTAN1    | Q13813              | 284364   | 5.22  | 93        | 40            |             |                 |
| 21       | Spectrin alpha chain, brain                  | SPTAN1    | Q13813              | 284364   | 5.22  |           |               | 122         | 12              |
| 22       | Spectrin alpha chain, brain                  | SPTAN1    | Q13813              | 284364   | 5.22  | 103       | 34            | 139         | 21              |
| 23       | Endoplasmin                                  | HSP90B1   | P14625              | 92411    | 4.76  |           |               | 447         | 23              |

|    |                                                            |         |        |       |      |     |    |     |    |
|----|------------------------------------------------------------|---------|--------|-------|------|-----|----|-----|----|
| 24 | Major vault protein                                        | MVP     | Q14764 | 99266 | 5.34 |     |    | 95  | 8  |
| 25 | Endoplasmin                                                | HSP90B1 | P14625 | 92411 | 4.76 |     |    | 178 | 12 |
| 26 | Endoplasmin                                                | HSP90B1 | P14625 | 92411 | 4.76 | 166 | 13 |     |    |
| 27 | Heat shock 70 kDa protein 4                                | HSPA4   | P34932 | 94331 | 5.10 |     |    | 180 | 12 |
| 28 | Heat shock 70 kDa protein 4                                | HSPA4   | P34932 | 94331 | 5.10 | 78  | 11 |     |    |
| 29 | Endoplasmin                                                | HSP90B1 | P14625 | 92411 | 4.76 |     |    | 131 | 7  |
| 30 | Fascin                                                     | FSCN1   | Q16658 | 54496 | 6.84 | 142 | 20 |     |    |
| 31 | Heterogeneous nuclear ribonucleoprotein L                  | HNRNPL  | P14866 | 64092 | 8.46 | 115 | 18 | 70  | 6  |
| 32 | Bifunctional purine biosynthesis protein PURH              | ATIC    | P31939 | 64575 | 6.27 | 127 | 21 |     |    |
| 33 | Prelamin-A/C                                               | LMNA    | P02545 | 74095 | 6.57 |     |    | 141 | 13 |
| 34 | Prelamin-A/C                                               | LMNA    | P02545 | 74095 | 6.57 | 98  | 11 | 153 | 14 |
| 35 | Prelamin-A/C                                               | LMNA    | P02545 | 74095 | 6.57 |     |    | 145 | 14 |
| 36 | Pre-mRNA-processing factor 19                              | PRPF19  | Q9UMS4 | 55146 | 6.14 |     |    | 146 | 9  |
| 37 | T- complex protein 1 subunit gamma                         | CCT3    | P49368 | 60495 | 6.10 |     |    | 253 | 7  |
| 38 | T-complex protein 1 subunit beta                           | CCT2    | P78371 | 57452 | 6.01 | 145 | 19 |     |    |
| 39 | Sorting nexin-6                                            | SNX6    | Q9UNH7 | 46620 | 5.81 |     |    | 155 | 12 |
| 40 | Aflatoxin B1 aldehyde reductase member 2                   | AKR7A2  | O43488 | 39564 | 6.70 |     |    | 249 | 17 |
| 41 | Sialic acid synthase                                       | NANS    | Q9NR45 | 40281 | 6.29 |     |    | 255 | 12 |
| 42 | Lipocalin-1                                                | LCN1    | P31025 | 19238 | 5.38 | 76  | 6  | 132 | 7  |
| 43 | Stress-70 protein                                          | HSPA9   | P38646 | 73635 | 5.87 | 66  | 13 | 117 | 8  |
| 44 | Proliferation-associated protein 2G4                       | PA2G4   | Q9UQ80 | 43759 | 6.13 | 92  | 16 | 158 | 11 |
| 45 | 28S ribosomal protein S22, mitochondrial                   | MRPS22  | P82650 | 41254 | 7.70 | 111 | 15 | 135 | 9  |
| 46 | Short-chain specific acyl-CoA dehydrogenase, mitochondrial | ACADS   | P16219 | 44269 | 8.13 | 61  | 9  | 126 | 7  |
| 47 | Heterogeneous nuclear ribonucleoproteins C1/C2             | HNRNPC  | P07910 | 33650 | 4.94 |     |    | 82  | 4  |
| 48 | Ribose- phosphate pyrophosphokinase 1                      | PRPS1   | P60891 | 34812 | 6.51 | 67  | 7  | 112 | 5  |
| 49 | Annexin A1                                                 | ANXA1   | P04083 | 38690 | 6.57 | 92  | 15 |     |    |
| 50 | RNA - binding protein 4                                    | RBM4    | Q9BWF3 | 40289 | 6.61 |     |    | 279 | 8  |
| 51 | RNA - binding protein 4B                                   | RBM4B   | Q9BQ04 | 40124 | 6.28 |     |    | 253 | 9  |
| 52 | 78 kDa glucose-regulated protein                           | HSPA5   | P11021 | 72288 | 5.07 | 188 | 32 |     |    |
| 53 | Thioredoxin domain- containing protein 12                  | TXNDC12 | O95881 | 19194 | 5.25 |     |    | 149 | 10 |

|    |                                                              |          |        |        |       |     |    |     |    |
|----|--------------------------------------------------------------|----------|--------|--------|-------|-----|----|-----|----|
| 54 | Actin, cytoplasmic 1                                         | ACTB     | P60709 | 41710  | 5.29  |     |    | 106 | 14 |
| 55 | Proteasome subunit beta type-4                               | PSMB4    | P28070 | 29185  | 5.70  |     |    | 113 | 13 |
| 56 | Thioredoxin-dependent peroxide reductase, mitochondrial      | PRDX3    | P30048 | 27675  | 7.68  | 185 | 23 | 133 | 14 |
| 57 | Actin, cytoplasmic 1                                         | ACTB     | P60709 | 41710  | 5.29  |     |    | 105 | 7  |
| 58 | Tubulin beta chain                                           | TUBB     | P07437 | 49639  | 4.78  | 75  | 15 | 198 | 13 |
| 59 | Heterogeneous nuclear ribonucleoproteins C1/C2               | HNRNPC   | P07910 | 33650  | 4.94  |     |    | 178 | 9  |
| 60 | Aldose reductase                                             | AKR1B1   | P15121 | 35830  | 6.52  | 60  | 14 | 88  | 6  |
| 61 | Endoplasmic                                                  | HSP90B1  | P14625 | 92411  | 4.76  | 87  | 20 | 67  | 4  |
| 62 | Nucleoprotein TPR                                            | TPR      | P12270 | 267131 | 4.97  |     |    | 133 | 7  |
| 63 | Stress-70 protein, mitochondrial                             | HSPA9    | P38646 | 73635  | 5.87  |     |    | 154 | 11 |
| 64 | Lamin- B1                                                    | LMNB1    | P20700 | 66368  | 5.11  | 71  | 15 | 139 | 7  |
| 65 | Peptidyl-prolyl cis-trans isomerase FKBP10                   | FKBP10   | Q96AY3 | 64204  | 5.36  |     |    | 251 | 12 |
| 66 | 26S protease regulatory subunit 7                            | PSMC2    | P35998 | 48603  | 5.71  | 127 | 23 |     |    |
| 67 | <b>Eukaryotic translation initiation factor 3 subunit G</b>  | EIF3G    | O75821 | 35589  | 5.87  |     |    | 110 | 5  |
| 68 | <b>Cytochrome b-c1 complex subunit Rieske, mitochondrial</b> | UQCRC1   | P47985 | 29649  | 8.55  |     |    | 122 | 5  |
| 69 | Omega-amidase NIT2                                           | NIT2     | Q9NQR4 | 30589  | 6.83  | 169 | 19 | 295 | 10 |
| 70 | Heterogeneous nuclear ribonuclear protein L                  | HNRNPL   | P14866 | 64092  | 8.46  |     |    | 249 | 18 |
| 71 | Alpha-enolase                                                | ENO1     | P06733 | 47139  | 7.01  | 157 | 19 |     |    |
| 72 | Histone H4                                                   | HIST1H4A | P62805 | 11360  | 11.36 | 158 | 18 | 413 | 32 |
| 73 | Heterogeneous nuclear ribonucleoprotein K                    | HNRNPK   | P61978 | 50944  | 5.39  | 118 | 29 | 305 | 18 |
| 74 | 60 kDa shock protein, mitochondrial                          | HSPD1    | P10809 | 61016  | 5.70  |     |    | 501 | 17 |
| 75 | Cytochrome c oxidase subunit 6B1                             | COX6B1   | P14854 | 10186  | 6.54  |     |    | 103 | 8  |

**Table 4:** List of proteins found to be differently expressed in the PDGF treated HK-2 cell line compared with untreated control. The gene name, accession number in Swiss-Prot, molecular weight, the peptide mass fingerprinting (PMF), MS/MS information and the sequence coverage are given. The spots where MS/MS-data are missing were only identified with PMF.

| Spot Nr. | Protein Name                                                | Gene Name | SwissProt Accession | Mol. Wt. | CPI  | PMF Score | PMF Seq. Cov. | MS/MS Score | MS/MS Seq. Cov. |
|----------|-------------------------------------------------------------|-----------|---------------------|----------|------|-----------|---------------|-------------|-----------------|
| 1        | Small ubiquitin-related modifier 2                          | SUMO2     | P61956              | 10864    | 5.32 |           |               | 92          | 6               |
| 2        | Coactosin-like protein                                      | COTL1     | Q14019              | 15935    | 5.50 |           |               | 274         | 11              |
| 3        | 78 kDa glucose-regulated protein                            | HSPA5     | P11021              | 72288    | 5.07 |           |               | 218         | 15              |
| 4        | Sorcin                                                      | SRI       | P30626              | 21662    | 5.32 |           |               | 191         | 9               |
| 5        | Chloride intracellular channel protein 1                    | CLIC1     | O00299              | 26906    | 5.09 | 151       | 18            |             |                 |
| 6        | Protein DJ-1                                                | PARK7     | Q99497              | 19878    | 6.32 | 132       | 18            |             |                 |
| 7        | Annexin A5                                                  | ANXA5     | P08758              | 35914    | 4.93 | 95        | 9             | 128         | 10              |
| 8        | Tubulin-folding cofactor B                                  | TBCB      | Q99426              | 27308    | 5.06 | 78        | 10            | 127         | 4               |
| 9        | Annexin A5                                                  | ANXA5     | P08758              | 35914    | 4.93 | 194       | 24            |             |                 |
| 10       | Elongation factor 1-delta                                   | EEF1D     | P29692              | 31103    | 4.90 |           |               | 204         | 8               |
| 11       | Peroxiredoxin 1                                             | PRDX1     | Q06830              | 22096    | 8.27 | 98        | 18            | 156         | 14              |
| 12       | Serine/arginine-rich splicing factor 7                      | SFRS7     | Q16629              | 27350    | 9.64 |           |               | 186         | 15              |
| 13       | Nucleophosmin                                               | NPM1      | P06748              | 32555    | 4.64 | 150       | 19            |             |                 |
| 14       | Nucleophosmin                                               | NPM1      | P06748              | 32555    | 4.64 | 153       | 17            |             |                 |
| 15       | Nucleophosmin                                               | NPM1      | P06748              | 32555    | 4.64 |           |               | 191         | 8               |
| 16       | Nucleophosmin                                               | NPM1      | P06748              | 32555    | 4.64 |           |               | 155         | 4               |
| 17       | Heterogeneous nuclear ribonucleoprotein C1/C2               | HNRNPC    | P07910              | 33650    | 4.94 |           |               | 258         | 9               |
| 18       | Heterogeneous nuclear ribonucleoprotein C1/C2               | HNRNPC    | P07910              | 33650    | 4.94 | 112       | 12            | 72          | 7               |
| 19       | Serine-threonine kinase receptor associated protein         | STRAP     | Q9Y3F4              | 38414    | 4.98 | 120       | 16            |             |                 |
| 20       | Heterogenous nuclear ribonucleoprotein C1/C2                | HNRNPC    | P07910              | 33650    | 4.94 |           |               | 159         | 6               |
| 21       | Histidine triad nucleotide-binding protein 2, mitochondrial | HINT2     | Q9BX68              | 17151    | 9.20 |           |               | 253         | 18              |

|    |                                                            |         |        |       |      |     |    |     |    |
|----|------------------------------------------------------------|---------|--------|-------|------|-----|----|-----|----|
| 22 | 40S ribosomal protein S12                                  | RPS12   | P25398 | 14505 | 6.81 |     |    | 82  | 9  |
| 23 | Cytochrome c oxidase subunit 5B, mitochondrial             | COX5B   | P10606 | 13687 | 9.07 |     |    | 237 | 16 |
| 24 | Eukaryotic translation initiation factor 1                 | EIF1    | P41567 | 12725 | 6.90 |     |    | 169 | 6  |
| 25 | Cystatin-B                                                 | CSTB    | P04080 | 11133 | 6.96 |     |    | 195 | 8  |
| 26 | Prefoldin subunit 2                                        | PFDN2   | Q9UHV9 | 16638 | 6.20 |     |    | 164 | 6  |
| 27 | Alpha-crystallin B chain                                   | CRYAB   | P02511 | 20146 | 6.76 |     |    | 140 | 7  |
| 28 | Proteasome subunit alpha type 2                            | PSMA2   | P25787 | 25882 | 6.91 | 142 | 15 | 115 | 5  |
| 29 | Chloride intracellular channel protein 4                   | CLIC4   | Q9Y696 | 28754 | 5.45 | 72  | 10 | 84  | 5  |
| 30 | Glutathione S-transferase omega-1                          | GSTO1   | P78417 | 27548 | 6.24 |     |    | 128 | 7  |
| 31 | UMP-CMP kinase                                             | CMPK1   | P30085 | 22208 | 5.44 | 65  | 8  | 132 | 6  |
| 32 | Heme-binding protein 1                                     | HEBP1   | Q9NRV9 | 21084 | 5.71 | 189 | 17 | 164 | 6  |
| 33 | Calponin-3                                                 | CNN3    | Q15417 | 36391 | 5.69 |     |    | 92  | 6  |
| 34 | Ubiquitin-fold modifier-conjugating enzyme 1               | UFC1    | Q9Y3C8 | 19446 | 6.91 |     |    | 152 | 8  |
| 35 | Superoxide dismutase [Mn], mitochondrial                   | SOD2    | P04179 | 24707 | 8.35 | 69  | 9  | 114 | 7  |
| 36 | Superoxide dismutase [Mn], mitochondrial                   | SOD2    | P04179 | 24707 | 8.35 |     |    | 118 | 7  |
| 37 | Delta(3,5)-Delta(2,4)-dienoyl-CoA isomerase, mitochondrial | ECH1    | Q13011 | 35793 | 8.16 |     |    | 288 | 18 |
| 38 | Vimentin                                                   | VIM     | P08670 | 53619 | 5.05 | 137 | 33 |     |    |
| 39 | Tubulin beta -4 chain                                      | TUBB4   | P04350 | 49554 | 4.78 | 163 | 22 |     |    |
| 40 | Tubulin beta chain                                         | TUBB    | P07437 | 49639 | 4.78 | 71  | 10 | 154 | 9  |
| 41 | Gamma-enolase                                              | ENO2    | P09104 | 47239 | 4.91 |     |    | 175 | 7  |
| 42 | Vimentin                                                   | VIM     | P08670 | 53619 | 5.05 | 174 | 35 |     |    |
| 43 | Galactokinase                                              | GALK1   | P51570 | 42246 | 6.04 |     |    | 136 | 8  |
| 44 | Alpha-enolase                                              | ENO1    | P06733 | 47139 | 7.01 | 98  | 12 | 197 | 12 |
| 45 | Proliferation-associated protein 2G4                       | PA2G4   | Q9UQ80 | 43759 | 6.13 |     |    | 132 | 13 |
| 46 | Heterogeneous nuclear ribonucleoprotein H3                 | HNRNPH3 | P31942 | 36903 | 6.37 |     |    | 117 | 7  |
| 47 | Eukaryotic translation initiation factor 3 subunit G       | EIF3G   | O75821 | 35589 | 5.87 | 88  | 11 | 129 | 5  |
| 48 | Heterogeneous nuclear ribonucleoprotein D-like             | HNRPDL  | O14979 | 46409 | 9.59 |     |    | 175 | 8  |
| 49 | Poly(rC)-binding protein 1                                 | PCBP1   | Q15365 | 37474 | 6.66 |     |    | 211 | 10 |
| 50 | Heterogeneous nuclear ribonucleoprotein D0                 | HNRNPD  | Q14103 | 38410 | 7.61 |     |    | 162 | 6  |
| 51 | Medium- chain specific acyl-CoA dehydrogenase,             | ACADM   | P11310 | 46559 | 8.61 | 79  | 12 | 203 | 13 |

|    |                                                         |         |        |       |      |     |    |     |    |
|----|---------------------------------------------------------|---------|--------|-------|------|-----|----|-----|----|
|    | mitochondrial                                           |         |        |       |      |     |    |     |    |
| 52 | Mannose-1-phosphate guanyltransferase alpha             | GMPPA   | Q96IJ6 | 46262 | 6.73 |     |    | 140 | 5  |
| 53 | Fascin                                                  | FSCN1   | Q16658 | 54496 | 6.84 | 78  | 14 | 212 | 12 |
| 54 | LIM and SH3 domain protein 1                            | LASP1   | Q14847 | 29698 | 6.61 | 115 | 16 | 146 | 12 |
| 55 | PDZ and LIM domain protein 1                            | PDLIM1  | O00151 | 36049 | 6.56 |     |    | 252 | 12 |
| 56 | Mitotic checkpoint protein BUB3                         | BUB3    | O43684 | 37131 | 6.36 |     |    | 122 | 7  |
| 57 | Isocitrate dehydrogenase [NADP], cytoplasmic            | IDH1    | O75874 | 46630 | 6.53 |     |    | 247 | 11 |
| 58 | Actin, cytoplasmic 1                                    | ACTB    | P60709 | 41710 | 5.29 | 158 | 13 |     |    |
| 59 | Actin, cytoplasmic 1                                    | ACTB    | P60709 | 41710 | 5.29 | 162 | 33 |     |    |
| 60 | Thioredoxin                                             | TXN     | P10599 | 11730 | 4.82 | 143 | 17 | 152 | 8  |
| 61 | Protein S100-A6                                         | S100A6  | P06703 | 10173 | 5.32 | 82  | 8  | 107 | 4  |
| 62 | Protein S100-A11                                        | S100A11 | P31949 | 11733 | 6.56 | 159 | 11 | 69  | 4  |
| 63 | Endoplasmic reticulum resident protein 29               | ERP29   | P30040 | 28975 | 6.77 | 118 | 18 |     |    |
| 64 | 26S proteasome non-ATPase regulatory subunit 10         | PSMD10  | O75832 | 24412 | 5.71 | 150 | 16 |     |    |
| 65 | Peroxiredoxin-4                                         | PRDX4   | Q13162 | 30521 | 5.86 | 79  | 13 | 111 | 7  |
| 66 | Src substrate cortactin                                 | CTTN    | Q14247 | 61549 | 5.24 | 101 | 22 | 153 | 8  |
| 67 | Heat shock cognate 71 kDa protein                       | HSPA8   | P11142 | 70854 | 5.37 | 96  | 18 |     |    |
| 68 | Macrophage-capping protein                              | CAPG    | P40121 | 38494 | 5.82 | 176 | 24 |     |    |
| 69 | Galactokinase                                           | GALK1   | P51570 | 42246 | 6.04 | 113 | 27 | 76  | 4  |
| 70 | Sialic acid synthase                                    | NANS    | Q9NR45 | 40281 | 6.29 | 95  | 16 | 110 | 4  |
| 71 | Thioredoxin-dependent peroxide reductase, mitochondrial | PRDX3   | P30048 | 27675 | 7.68 | 145 | 18 |     |    |
| 72 | 78 kDa glucose-regulated protein                        | HSPA5   | P11021 | 72288 | 5.07 | 222 | 30 |     |    |
| 74 | Lamin-B1                                                | LMNB1   | P20700 | 66368 | 5.11 | 112 | 26 |     |    |
| 75 | Transitional endoplasmic reticulum ATPase               | VCP     | P55072 | 89266 | 5.14 | 197 | 37 |     |    |
| 76 | Protein disulfide-isomerase A3                          | PDIA3   | P30101 | 56747 | 5.98 | 131 | 22 |     |    |
| 77 | Isocitrate dehydrogenase [NADP], cytoplasmic            | IDH1    | O75874 | 46630 | 6.53 | 97  | 19 | 143 | 8  |
| 78 | Aldose reductase                                        | AKR1B1  | P15121 | 35830 | 6.52 | 120 | 12 | 176 | 8  |
| 79 | Prelamin-A/C                                            | LMNA    | P02545 | 74095 | 6.57 | 74  | 26 | 198 | 10 |
| 80 | Endoplasmin                                             | HSP90B1 | P14625 | 92411 | 4.76 | 82  | 22 |     |    |
| 81 | Endoplasmin                                             | HSP90B1 | P14625 | 92411 | 4.76 |     |    | 152 | 14 |

|    |                                                |        |               |       |      |     |    |     |    |
|----|------------------------------------------------|--------|---------------|-------|------|-----|----|-----|----|
| 82 | 60 kDa heat shock protein, mitochondrial       | HSPD1  | <b>P10809</b> | 61016 | 5.70 | 80  | 20 |     |    |
| 83 | Tubulin beta chain                             | TUBB   | <b>P07437</b> | 49639 | 4.78 | 110 | 18 |     |    |
| 84 | Actin, cytoplasmic 1                           | ACTB   | <b>P60709</b> | 41710 | 5.29 | 104 | 18 |     |    |
| 85 | Vimentin                                       | VIM    | <b>P08670</b> | 53619 | 5.05 | 149 | 27 |     |    |
| 86 | Heterogeneous nuclear ribonucleoproteins C1/C2 | HNRNPC | <b>P07910</b> | 33650 | 4.95 | 68  | 14 | 75  | 6  |
| 87 | Annexin A3                                     | ANXA3  | <b>P12429</b> | 36353 | 5.62 | 77  | 17 | 193 | 11 |

**Table 5:** List of proteins identified from immunoprecipitation of the WT-DJ-1 transfected TK-173 and HK-2 cell lysates using anti-DJ-1 antibody and G-protein agarose matrix. The gene name, accession number in Swiss-Prot, protein mass, and MS/MS information are given.

| Spot Nr. | Protein Name                              | Gene Name | SwissProt Accession | Mol. Wt. | CPI  | MS/MS Score | MS/MS Seq. Cov. |
|----------|-------------------------------------------|-----------|---------------------|----------|------|-------------|-----------------|
| 1        | Myosin regulatory light chain 12A         | MYL12A    | P19105              | 19781    | 4.65 | 139         | 4               |
| 2        | Protein DJ-1                              | PARK7     | Q99497              | 19878    | 6.32 | 118         | 6               |
| 3        | Peroxiredoxin-1                           | PRDX1     | Q06830              | 22096    | 8.27 | 108         | 5               |
| 4        | Peroxiredoxin-6                           | PRDX6     | P30041              | 25035    | 6.00 | 88          | 4               |
| 5        | Prohibitin                                | PHB       | P35232              | 29786    | 5.57 | 99          | 8               |
| 6        | ADP/ATP translocase 2                     | SLC25A5   | P05141              | 32831    | 9.71 | 126         | 6               |
| 7        | Annexin A5                                | ANXA5     | P08758              | 35914    | 4.93 | 167         | 8               |
| 8        | Glyceraldehyde-3-phosphate dehydrogenase  | GAPDH     | P04406              | 36030    | 8.57 | 335         | 10              |
| 9        | L-lactate dehydrogenase A chain           | LDHA      | P00338              | 36665    | 8.44 | 100         | 5               |
| 10       | Annexin A2                                | ANXA2     | P07355              | 38580    | 7.57 | 580         | 12              |
| 11       | Annexin A1                                | ANXA1     | P04083              | 38690    | 6.57 | 304         | 11              |
| 12       | Actin, cytoplasmic 1                      | ACTB      | P60709              | 41710    | 5.29 | 258         | 9               |
| 13       | Actin, cytoplasmic 2                      | ACTG1     | P63261              | 41766    | 5.31 | 140         | 6               |
| 14       | Alpha-enolase                             | ENO1      | P06733              | 47139    | 7.01 | 390         | 11              |
| 15       | Tubulin beta chain                        | TUBB      | P07437              | 49639    | 4.78 | 259         | 13              |
| 16       | Vimentin                                  | VIM       | P08670              | 53619    | 5.05 | 574         | 21              |
| 17       | Pyruvate kinase isozymes M1/M2            | PKM       | P14618              | 57900    | 7.96 | 179         | 6               |
| 18       | Heterogeneous nuclear ribonucleoprotein L | HNRNPL    | P14866              | 64092    | 8.46 | 98          | 4               |
| 19       | Ezrin                                     | EZR       | P15311              | 69370    | 5.94 | 149         | 7               |
| 20       | Heat shock cognate 71 kDa protein         | HSPA8     | P11142              | 70854    | 5.37 | 372         | 9               |
| 21       | Heat shock 70 kDa protein 6               | HSPA6     | P17066              | 70984    | 5.81 | 153         | 6               |
| 22       | 78 kDa glucose-regulated protein          | HSPA5     | P11021              | 72288    | 5.07 | 347         | 8               |



|    |                                |          |        |        |      |     |    |
|----|--------------------------------|----------|--------|--------|------|-----|----|
| 23 | Heat shock protein HSP 90-beta | HSP90AB1 | P08238 | 83212  | 4.96 | 522 | 14 |
| 24 | Elongation factor 2            | EEF2     | P13639 | 95277  | 6.41 | 110 | 5  |
| 25 | Poly [ADP-ribose] polymerase 1 | PARP1    | P09874 | 113012 | 8.99 | 148 | 5  |
| 26 | Clathrin heavy chain 1         | CLTC     | Q00610 | 191493 | 5.48 | 190 | 6  |
| 27 | Filamin-A                      | FLNA     | P21333 | 280564 | 5.70 | 776 | 20 |
| 28 | Filamin-C                      | FLNC     | Q14315 | 290841 | 5.65 | 420 | 16 |

**Table 6:** List of proteins identified from immunoprecipitation of the mutant E18Q-DJ-1 in TK-173 and HK-2 cell lysates using the QIA express Ni-NTA Fast Start assay. The gene name, accession number in Swiss-Prot, protein mass, and MS/MS information are given.

| Spot Nr. | Protein Name                                   | Gene Name | SwissProt Accession | Mol. Wt. | CPI   | MS/MS Score | MS/MS Seq. Cov. |
|----------|------------------------------------------------|-----------|---------------------|----------|-------|-------------|-----------------|
| 1        | 60S ribosomal protein L31                      | RPL31     | P62899              | 14454    | 10.54 | 59          | 4               |
| 2        | Peptidyl-prolyl cis-trans isomerase A          | PPIA      | P62937              | 18001    | 7.68  | 59          | 5               |
| 3        | Cofilin-1                                      | CFL1      | P23528              | 18491    | 8.22  | 44          | 4               |
| 4        | Protein DJ-1                                   | PARK7     | Q99497              | 19878    | 6.32  | 52          | 6               |
| 5        | Ferritin light chain                           | FTL       | P02792              | 20007    | 5.50  | 46          | 4               |
| 6        | Peroxiredoxin-1                                | PRDX1     | Q06830              | 22096    | 8.27  | 43          | 4               |
| 7        | Peptidyl-prolyl cis-trans isomerase B          | PPIB      | P23284              | 23728    | 9.42  | 104         | 8               |
| 8        | Ras-related protein Rab-11A                    | RAB11A    | P62491              | 24378    | 6.12  | 67          | 6               |
| 9        | Superoxide dismutase [Mn], mitochondrial       | SOD2      | P04179              | 24707    | 8.35  | 68          | 7               |
| 10       | Malate dehydrogenase, mitochondrial            | MDH2      | P40926              | 35481    | 8.92  | 76          | 4               |
| 11       | Annexin A5                                     | ANXA5     | P08758              | 35914    | 4.93  | 334         | 10              |
| 12       | Glyceraldehyde-3-phosphate dehydrogenase       | GAPDH     | P04406              | 36030    | 8.57  | 197         | 4               |
| 13       | Annexin A2                                     | ANXA2     | P07355              | 38580    | 7.57  | 289         | 12              |
| 14       | Annexin A1                                     | ANXA1     | P04083              | 38690    | 6.57  | 141         | 5               |
| 15       | Actin, cytoplasmic 1                           | ACTB      | P60709              | 41710    | 5.29  | 202         | 6               |
| 16       | Actin, cytoplasmic 2                           | ACTG1     | P63261              | 41766    | 5.31  | 191         | 12              |
| 17       | Alpha-enolase                                  | ENO1      | P06733              | 47139    | 7.01  | 68          | 7               |
| 18       | Serine hydroxymethyltransferase, mitochondrial | SHMT2     | P34897              | 55958    | 8.76  | 92          | 9               |
| 19       | Protein disulfide-isomerase                    | P4HB      | P07237              | 57081    | 4.76  | 72          | 5               |
| 20       | Pyruvate kinase isozymes M1/M2                 | PKM2      | P14618              | 57900    | 7.96  | 206         | 15              |
| 21       | Glutamate dehydrogenase 1, mitochondrial       | GLUD1     | P00367              | 61359    | 7.66  | 69          | 5               |
| 22       | 78 kDa glucose-regulated protein               | HSPA5     | P11021              | 72288    | 5.07  | 131         | 7               |
| 23       | Heat shock protein HSP 90-alpha                | HSP90AA1  | P07900              | 84607    | 4.94  | 99          | 6               |

|    |             |         |        |       |      |     |   |
|----|-------------|---------|--------|-------|------|-----|---|
| 24 | Endoplasmin | HSP90B1 | P14625 | 92411 | 4.76 | 130 | 7 |
|----|-------------|---------|--------|-------|------|-----|---|

**Table 7:** List of proteins identified from immunoprecipitation of the mutant E18D-DJ-1 in TK-173 and HK-2 cell lysates using the QIA express Ni-NTA Fast Start assay. The gene name, accession number in Swiss-Prot, protein mass, and MS/MS information are given.

| Spot Nr. | Protein Name                                         | Gene Name | SwissProt Accession | Mol. Wt. | CPI  | MS/MS Score | MS/MS Seq. Cov. |
|----------|------------------------------------------------------|-----------|---------------------|----------|------|-------------|-----------------|
| 1        | Profilin-1                                           | PFN1      | P07737              | 15045    | 8.44 | 40          | 3               |
| 2        | Peptidyl-prolyl cis-trans isomerase A                | PPIA      | P62937              | 18001    | 7.68 | 53          | 4               |
| 3        | Lipocalin-1                                          | LCN1      | P31025              | 19238    | 5.38 | 98          | 3               |
| 4        | Peroxiredoxin-2                                      | PRDX2     | P32119              | 21878    | 5.66 | 147         | 12              |
| 5        | Peroxiredoxin-1                                      | PRDX1     | Q06830              | 22096    | 8.27 | 89          | 5               |
| 6        | Ras-related protein Rab-2A                           | RAB2A     | P61019              | 23531    | 6.08 | 54          | 6               |
| 7        | Superoxide dismutase [Mn], mitochondrial             | SOD2      | P04179              | 24707    | 8.35 | 64          | 4               |
| 8        | Peroxiredoxin-6                                      | PRDX6     | P30041              | 25035    | 6.00 | 83          | 9               |
| 9        | Triosephosphate isomerase                            | TPI1      | P60174              | 30772    | 5.65 | 55          | 4               |
| 10       | 1-acyl-sn-glycerol-3-phosphate acyltransferase alpha | AGPAT1    | Q99943              | 31696    | 9.48 | 68          | 6               |
| 11       | Enoyl-CoA delta isomerase 1, mitochondrial           | ECI1      | P42126              | 32795    | 8.80 | 88          | 7               |
| 12       | Annexin A2                                           | ANXA2     | P07355              | 38580    | 7.57 | 319         | 8               |
| 13       | Fructose-bisphosphate aldolase A                     | ALDOA     | P04075              | 39395    | 8.30 | 44          | 7               |
| 14       | Actin, cytoplasmic 1                                 | ACTB      | P60709              | 41710    | 5.29 | 65          | 10              |
| 15       | Serpin H1                                            | SERPINH1  | P50454              | 46411    | 8.75 | 212         | 7               |
| 16       | Protein disulfide-isomerase A6                       | PDIA6     | Q15084              | 48091    | 4.95 | 87          | 4               |
| 17       | Acyl-coenzyme A thioesterase 9, mitochondrial        | ACOT9     | Q9Y305              | 49870    | 8.81 | 137         | 10              |
| 18       | Tubulin alpha-1B chain                               | TUBA1B    | P68363              | 50120    | 4.94 | 166         | 5               |
| 19       | ATP synthase subunit beta, mitochondrial             | ATP5B     | P06576              | 56525    | 5.26 | 205         | 5               |
| 20       | EH domain-containing protein 2                       | EHD2      | Q9NZN4              | 61123    | 6.02 | 99          | 3               |
| 21       | 78 kDa glucose-regulated protein                     | HSPA5     | P11021              | 72288    | 5.07 | 235         | 18              |
| 22       | Stress-70 protein, mitochondrial                     | HSPA6     | P38646              | 73635    | 5.87 | 62          | 3               |

|    |                    |         |        |        |      |     |   |
|----|--------------------|---------|--------|--------|------|-----|---|
| 23 | Endoplasmin        | HSP90B1 | P14625 | 92411  | 4.76 | 120 | 9 |
| 24 | Alpha-actinin-1    | ACTN1   | P12814 | 102993 | 5.25 | 64  | 4 |
| 25 | Carboxypeptidase D | CPD     | O75976 | 152835 | 5.68 | 61  | 3 |
